# Supplementary material for: Biokinetics and Internal Dosimetry of Tritiated Steel Particles
Source: MDPI journal article supplement (doi:10.3390/toxics10100602), 2022-10-12
Supplement: s1 [file s1]

## Supplementary Information

# Biokinetics and Internal Dosimetry of Tritiated Steel Particles

Rachel Smith <sup>1,\*</sup>, Michele Ellender <sup>1</sup>, Chang Guo <sup>1</sup>, Derek Hammond <sup>1</sup>, Adam Laycock <sup>1</sup>, Martin O. Leonard <sup>1</sup>, Matthew Wright <sup>1</sup>, Michael Davidson <sup>1</sup>, Véronique Malard <sup>2</sup>, Mickaël Payet <sup>3</sup>, Christian Grisolia <sup>3</sup> and Eric Blanchardon <sup>4,\*</sup>

<sup>1</sup> Radiation Chemicals and Environmental Hazards, UK Health Security Agency, Harwell Campus, Didcot OX11 0RQ, UK

<sup>2</sup> Biosciences and Biotechnology Institute of Aix-Marseille (BIAM) (Aix-Marseille University, French Alternative Energies and Atomic Energy Commission (CEA), French National Centre for Scientific Research (CNRS)), 13108 Saint Paul-Lez-Durance, France

<sup>3</sup> Institute for Magnetic Fusion Research (IRFM), French Alternative Energies and Atomic Energy Commission (CEA), 13108 Saint-Paul-lez-Durance, France

<sup>4</sup> Institut de Radioprotection et de Sûreté Nucléaire (IRSN), 92260 Fontenay-aux-Roses, France

\* Correspondence: rachel.smith@ukhsa.gov.uk (R.S.); eric.blanchardon@irsn.fr (E.B.)

## 1. Supplementary Tables

**Table S1.** Gamble's solution\*

| Chemical                    | Composition                                                                     | Concentration (g L <sup>-1</sup> ) |
|-----------------------------|---------------------------------------------------------------------------------|------------------------------------|
| Magnesium chloride          | MgCl <sub>2</sub>                                                               | 0.095                              |
| Sodium chloride             | NaCl                                                                            | 6.019                              |
| Potassium chloride          | KCl                                                                             | 0.298                              |
| Sodium phosphate            | Na <sub>2</sub> HPO <sub>4</sub>                                                | 0.126                              |
| Sodium sulphate             | Na <sub>2</sub> SO <sub>4</sub>                                                 | 0.063                              |
| Calcium chloride dihydrate  | CaCl <sub>2</sub> .2H <sub>2</sub> O                                            | 0.368                              |
| Sodium acetate              | C <sub>2</sub> H <sub>3</sub> O <sub>2</sub> Na                                 | 0.547                              |
| Sodium bicarbonate          | NaHCO <sub>3</sub>                                                              | 2.604                              |
| Trisodium citrate dihydrate | C <sub>6</sub> H <sub>5</sub> Na <sub>3</sub> O <sub>7</sub> .2H <sub>2</sub> O | 0.097                              |

\*From [1]

**Table S2.** Samples collected\*

| Sample name | Sample type | Sample description                      |
|-------------|-------------|-----------------------------------------|
| BLD         | Blood       | Blood                                   |
| L1          | Lung        | Right top lobe                          |
| L2          | Lung        | Right middle lobe                       |
| LTT         | Lung        | Left Lobe                               |
| Lv          | Liver       | Small sample from liver                 |
| LvTT        | Liver       | Sample from liver                       |
| Kid         | Kidney      | Small sample from kidney (~ 1/3 kidney) |
| M           | Muscle      | Small sample from left leg              |
| MTT         | Muscle      | Larger muscle sample                    |

\*note not all samples were analysed

**Table S3.** Overview of operating cycle for pyrolysis approach

| Analysis of samples for total tritium                                                                           | Analysis of samples for OBT and HTO separately                       |
|-----------------------------------------------------------------------------------------------------------------|----------------------------------------------------------------------|
| Set up pyrolyser, start air flowing at $\approx 0.25$ litres/minute                                             |                                                                      |
| Ramp temperature at $3^{\circ}\text{C}/\text{minute}$ to $180^{\circ}\text{C}$                                  |                                                                      |
| Hold temperature at $180^{\circ}\text{C}$ for 30 minutes                                                        | Hold temperature at $180^{\circ}\text{C}$ for 90 minutes             |
| No bubbler change required                                                                                      | Change bubbler for OBT collection 5 to 15 minutes before second ramp |
| Ramp temperature at $5^{\circ}\text{C}/\text{minute}$ to $300^{\circ}\text{C}$                                  |                                                                      |
| Hold temperature at $300^{\circ}\text{C}$ for 15 minutes                                                        |                                                                      |
| Ramp temperature at $5^{\circ}\text{C}/\text{minute}$ to $500^{\circ}\text{C}$                                  |                                                                      |
| Change gas to oxygen flowing at $\approx 0.25$ litres/minute                                                    |                                                                      |
| Ramp temperature at $5^{\circ}\text{C}/\text{minute}$ to $900^{\circ}\text{C}$ and hold for at least 30 minutes |                                                                      |
| Turn off furnaces, open vents and turn on cooling fan                                                           |                                                                      |

**Table S4.** Estimated organ masses\*

| Post-exposure time | Lung (g) | Liver (g) | Kidney (g) | Whole body (g) | RoB <sup>§</sup> (g) |
|--------------------|----------|-----------|------------|----------------|----------------------|
| 1h                 | 1.55     | 7.74      | 2.30       | 296.46         | 284.88               |
| 1d                 | 1.55     | 7.74      | 2.30       | 296.46         | 284.88               |
| 3d                 | 1.55     | 7.76      | 2.31       | 298.15         | 286.53               |
| 7d                 | 1.55     | 7.76      | 2.31       | 298.15         | 286.53               |
| 14d                | 1.56     | 7.78      | 2.33       | 299.85         | 288.18               |
| 28d                | 1.57     | 7.85      | 2.37       | 304.92         | 293.13               |
| 56d                | 1.59     | 7.94      | 2.43       | 311.69         | 299.74               |
| 85d                | 1.61     | 8.02      | 2.49       | 318.46         | 306.34               |

\*extrapolated from data in [2]

<sup>§</sup> Rest of Body (RoB) mass estimated by subtracting lung, liver and kidney from whole body**Table S5.** Organically bound tritium (OBT) and tritiated water (HTO) in liver samples at 1- and 7-days post-exposure

| sample no.           | HTO Specific activity (Bq/g) | SD* (Bq/g) | OBT Specific activity (Bq/g) | SD (Bq/g) | Total Specific activity (Bq/g) | % OBT   |
|----------------------|------------------------------|------------|------------------------------|-----------|--------------------------------|---------|
| 1 – 1d               | 0.59                         | 0.14       | 106.00                       | 24.00     | 106.59                         | 99.5%   |
| 2 – 1d               | 0.04                         | 0.03       | 61.00                        | 14.00     | 61.04                          | 99.9%   |
| 3 – 1d               | 0.48                         | 0.12       | 92.00                        | 21.00     | 92.48                          | 99.5%   |
| 4 – 1d               | 0.19                         | 0.05       | 100.00                       | 23.00     | 100.19                         | 99.8%   |
| Average              | 0.33                         |            | 89.75                        |           | 90.08                          | 99.7%   |
| 1 – 7d               | 0.24                         | 0.07       | 53.00                        | 12.00     | 53.24                          | 99.6%   |
| 2 – 7d               | 0.50                         | 0.12       | 45.00                        | 10.00     | 45.50                          | 98.9%   |
| 3 – 7d               | 1.50                         | 0.38       | 56.00                        | 13.00     | 57.60                          | 97.2%   |
| 4 – 7d               | < 0.03                       | NA         | 40.00                        | 9.00      | < 40.03                        | > 99.9% |
| Average <sup>§</sup> | 0.59                         |            | 48.50                        |           | 49.09                          | 98.8%   |

\*Standard deviation

<sup>§</sup>Assuming 0.03 for sample 4

**Table S6.** Studies in the literature on the release of tritium from tritiated particles

| Reference                   | Tritiated Material               | Lung fluid simulant               | Particle size $\mu\text{m}$ (og)          | Results<br>Release Rate (t/2)                                                                                                                                   |
|-----------------------------|----------------------------------|-----------------------------------|-------------------------------------------|-----------------------------------------------------------------------------------------------------------------------------------------------------------------|
| Cool and Maillie (1983) [3] | Glass                            | Simulated lung fluid              | 3.8                                       | 98% half-time 13 d and 2% half-time 220 d                                                                                                                       |
| Cheng et al (1997) [4]      | Titanium                         | SUF - serum ultrafiltrate         | 0.95<br>103                               | 24% half-time 1 d and 76% half-time 33 d<br>Half-time 361 d                                                                                                     |
| Inkret et al (2001) [5]     | Hafnium                          | Simulated lung fluid (no details) | 1                                         | Study 1: 0.2% half-time 43d and 99.8% half-time @ $5 \times 10^5$ d<br>Study 2: approximately 0.05% release in 200 days                                         |
| Cheng et al (2002) [6]      | Hafnium                          | Simulated lung fluid              | 1.74                                      | Very insoluble. Less than 1% release after 215 days<br>99.92% half-time $4.28 \times 10^5$ d and 0.08% half-time 46 days                                        |
| Hodgson et al (2002) [7]    | Graphite                         | Lung serum simulant               | Fine<br>Coarse                            | 0.3% half-time 2 m and 99.7% half-time 1925 d<br>5% half-time 2 m and 95% half-time 110 d                                                                       |
| Zhou and Cheng (2004) [8]   | Hafnium<br>Titanium<br>Zirconium | SUF - serum ultrafiltrate         | 29.7 (2.41)<br>6.15 (1.93)<br>4.43 (2.24) | 99.9237% half-time $4.28 \times 10^5$ d and 0.076% half-time 46 d<br>24% half-time 1 d and 76% half-time 33 d<br>47.5% half-time 42 d and 52.5% half-time 385 d |
| Hodgson et al (2006) [9]    | Graphite                         | Lung serum simulant               | Not defined                               | For the most soluble materials<br>6.45% half-time 2 m, 8.69% half-time 1.3 d and 85% half-time 456 d                                                            |
| Zhou et al (2010) [10]      | Zirconium                        | SUF - serum ultrafiltrate         | 0.34 (2.34)                               | Total tritium release 37% by 71 days<br>47.5% half-time 42 d and 52.5% half-time 385 d                                                                          |

**Table S7.** Metal tritide biokinetic studies in the literature

| Material          | Activity per animal | Particle Size             | Animal type                                                                      | Total animals                      | Time points (Grp no.)                              | Organs                                                                 | Excreta                                                                                                                                                 | Exhaled air                                                                  | Sample processing and counting                                                                                                                                                | Ref                     |
|-------------------|---------------------|---------------------------|----------------------------------------------------------------------------------|------------------------------------|----------------------------------------------------|------------------------------------------------------------------------|---------------------------------------------------------------------------------------------------------------------------------------------------------|------------------------------------------------------------------------------|-------------------------------------------------------------------------------------------------------------------------------------------------------------------------------|-------------------------|
| Titanium Tritide  | 1 MBq               | CMD 0.95 $\mu$ m GSD 1.93 | F344/Crl rats (male) obtained at 8 weeks, 11-12 week at instillation             | 36                                 | 3, 14, 30, 61, 121 days (6 animals)                | Lungs and bronchial lymph nodes                                        | 6 rats Individual met cages, urine and faeces collected daily for 10 days and then 5 consecutive days at 1, 2 and 4 months                              | Exhaled air from 2 of the metabolic cages collected at same times as excreta | Base digestion procedure. Counting corrected for dissolution of particles.                                                                                                    | Chen et al. 1999 [11]   |
| Hafnium Tritide   | 1.55 MBq            | CMD 1.04 $\mu$ m GSD 2.41 | F344/Crl rats (male) Obtained at 8 weeks age, not clear what age at instillation | 52 (some confusion may be only 44) | 1h, 1,2,3,7,14 days and 1,2,4,6 months (4 animals) | Lungs, bronchial lymph nodes, liver kidney, muscle, blood and GI tract | 4 rats Individual met cages, urine and faeces collected daily for 14 days and then 3 consecutive days at 1,2,4 and 6 months                             | Exhaled air from 2 metabolic cages collected at same time as excreta         | Sample analysis as for above study, except for urine which was counted directly and faeces which underwent a combustion technique. Indicates HTO and OBT separately measured. | Zhuo and Chen 2003 [12] |
| Zirconium Tritide | 0.925 MBq           | CMD 0.34 $\mu$ m GSD 2.24 | F344/Crl rats (male) obtained at 7 weeks, 12-13 weeks at instillation            | 49                                 | 1h, 1,2,3,7,14,30,60,120,180 days (4 animals)      | Lungs, bronchial lymph nodes, liver kidney, muscle, blood              | 4 rats Individual met cages, urine and faeces collected daily for 10 days and then 3 consecutive days at 1,2,4 and 6 months. Animals sacrificed at 180d | Exhaled air from 2 metabolic cages collected at same time as excreta         | All tissue and excreta samples treated using a combustion method. Analysed in water part of tissue and dried (HTO, OBT).                                                      | Zhuo et al. 2010 [10]   |

## 2. Supplementary Figures

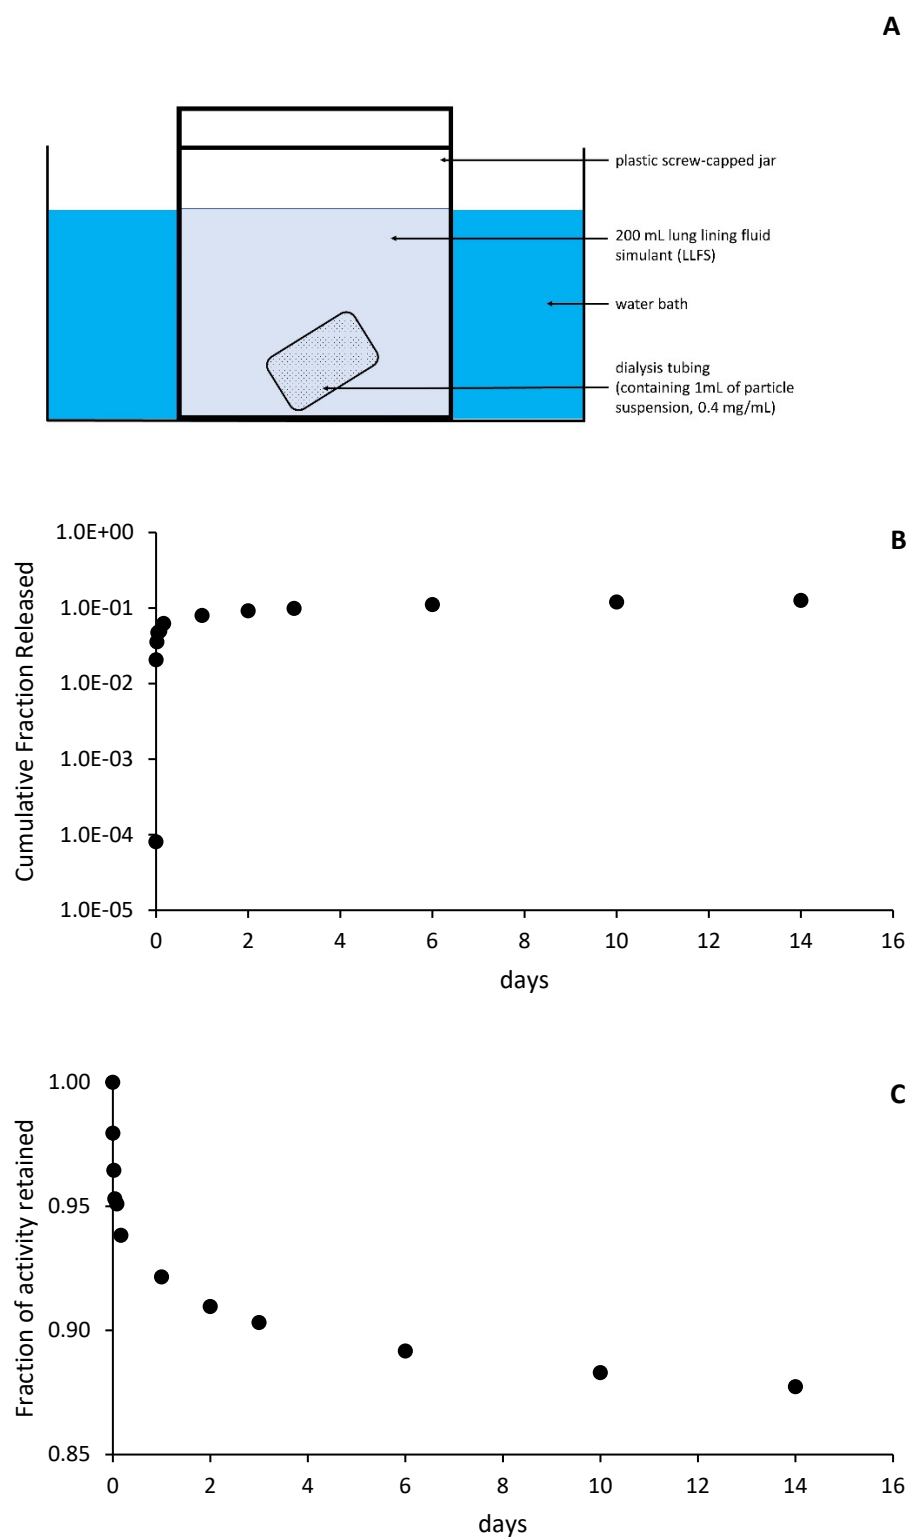

**Figure S1.** In vitro tritium release study. Schematic of experimental set-up (A) (note 1 mL samples taken from LLFS in screw-capped jar at times to 14 days and analysed for tritium content), cumulative fraction of tritium released from (B) and retained in (C) the particles.

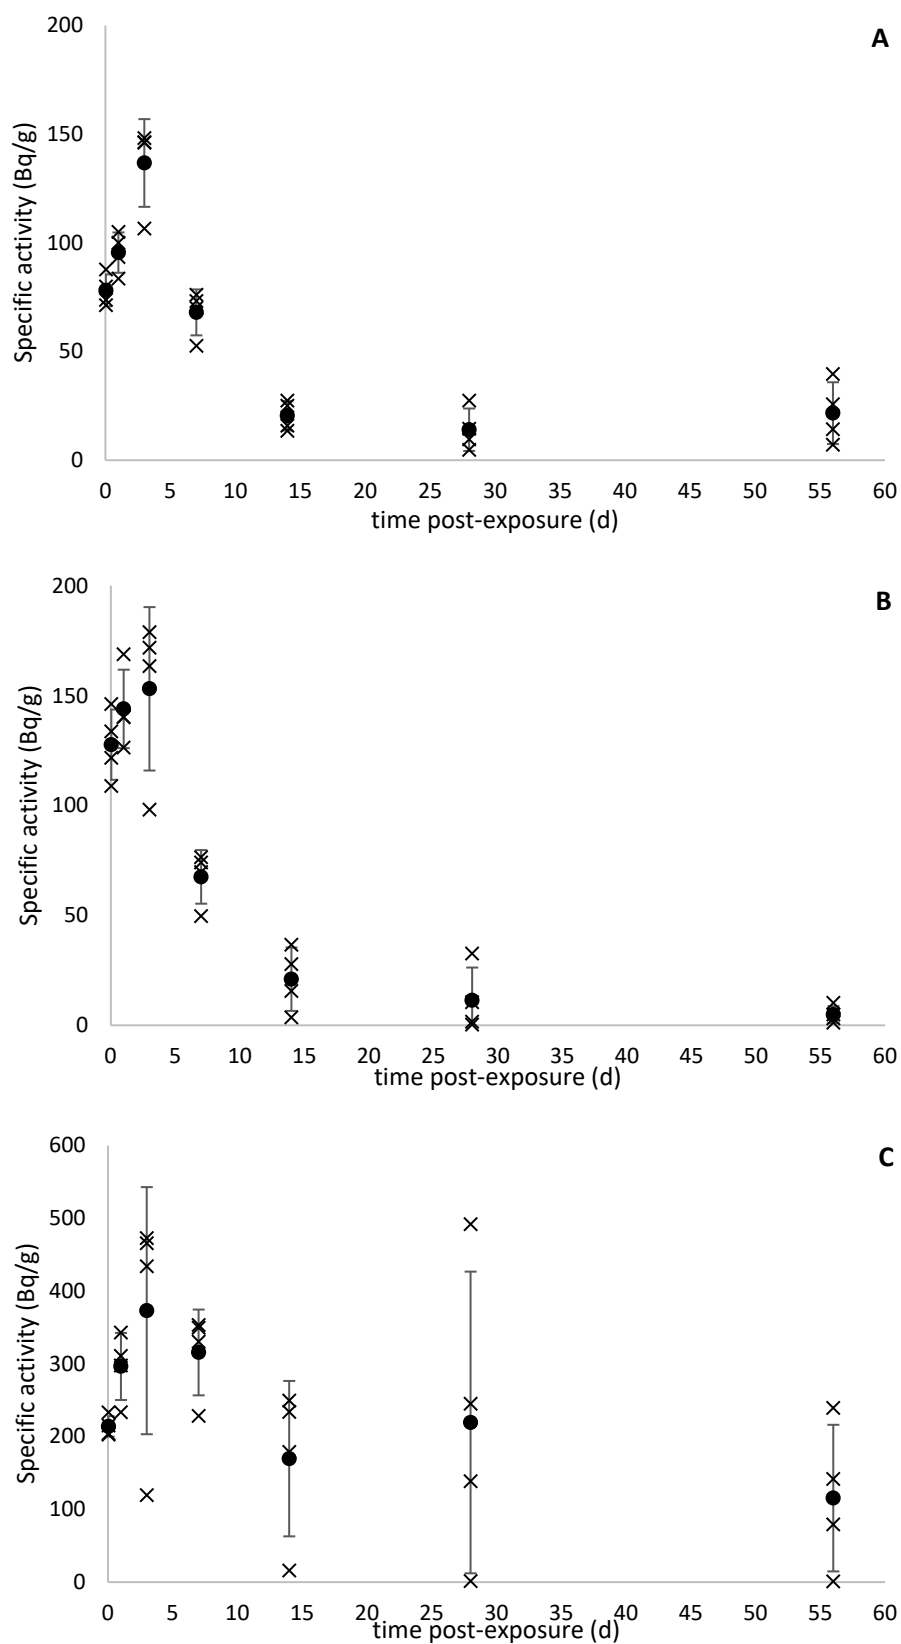

**Figure S2.** Specific activity of muscle (A), liver (B) and kidney (C) samples (mean  $\pm$  SD).

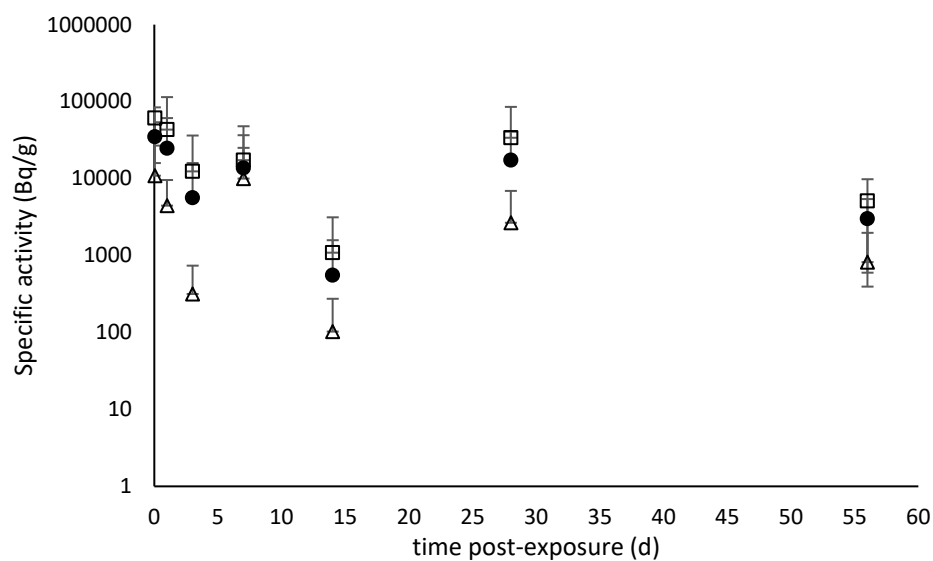

**Figure S3.** Specific activity of lung (n=4) (circles) derived from values for top right lobe (squares) and right middle lobe (triangles) (mean  $\pm$  SD).

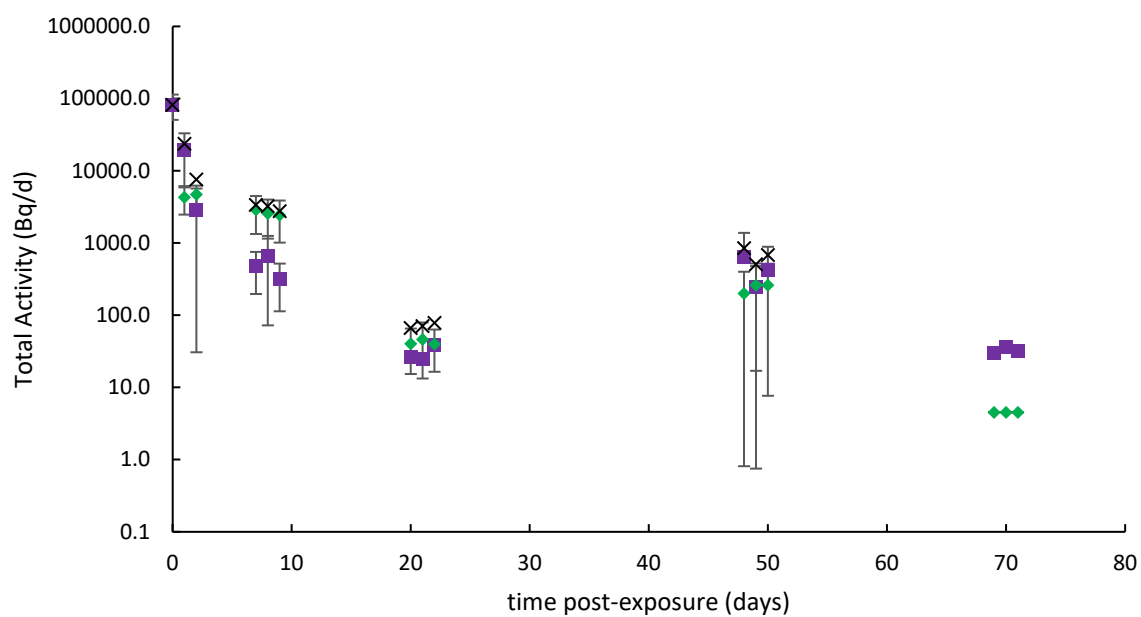

**Figure S4.** Daily excreted activity in faeces (purple squares) and urine (green diamonds) and total (x) (mean  $\pm$  SD) (note that (i) value at d0 is for faeces only, and (ii) faeces and urine values without error bars are at limit of detection and are included for indicative purposes only).

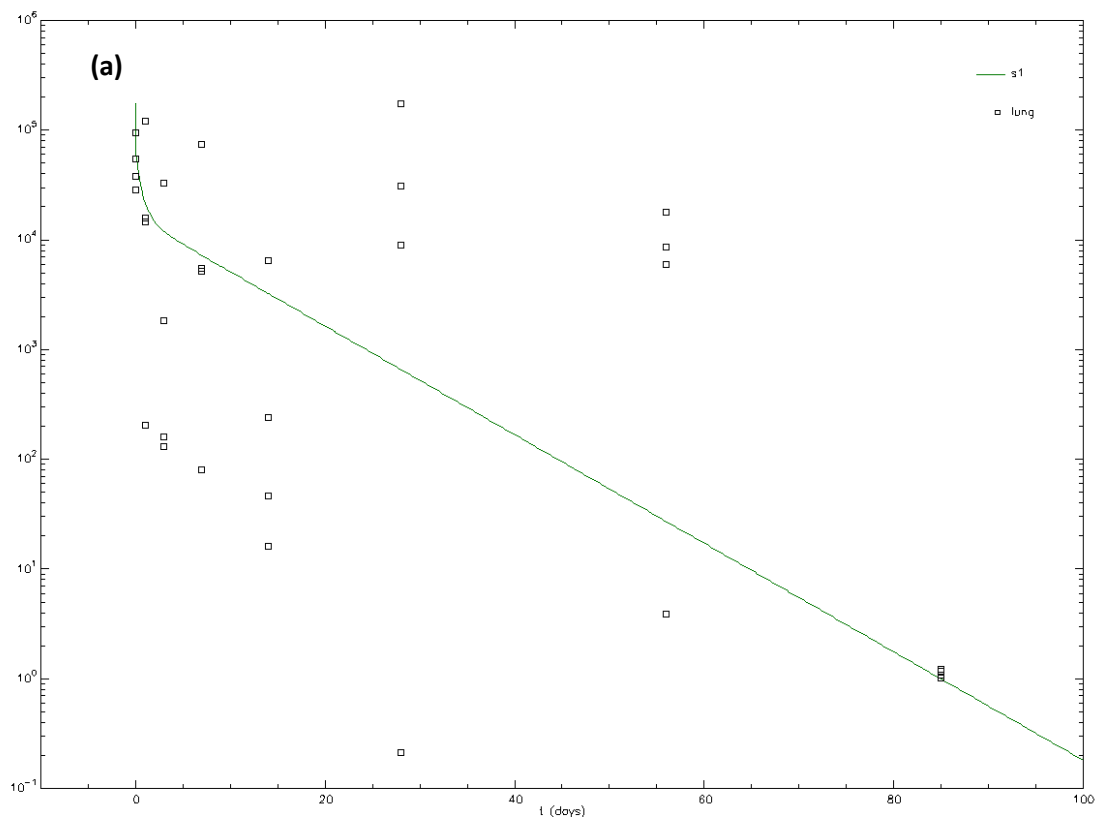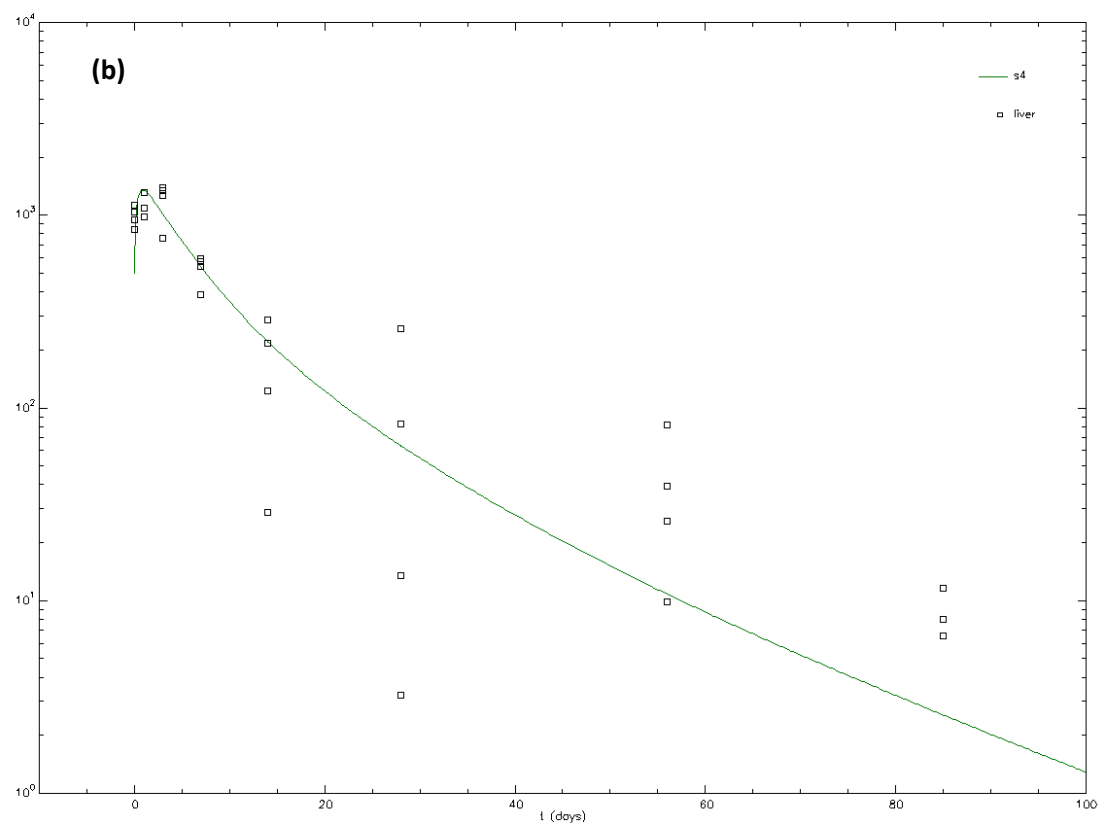



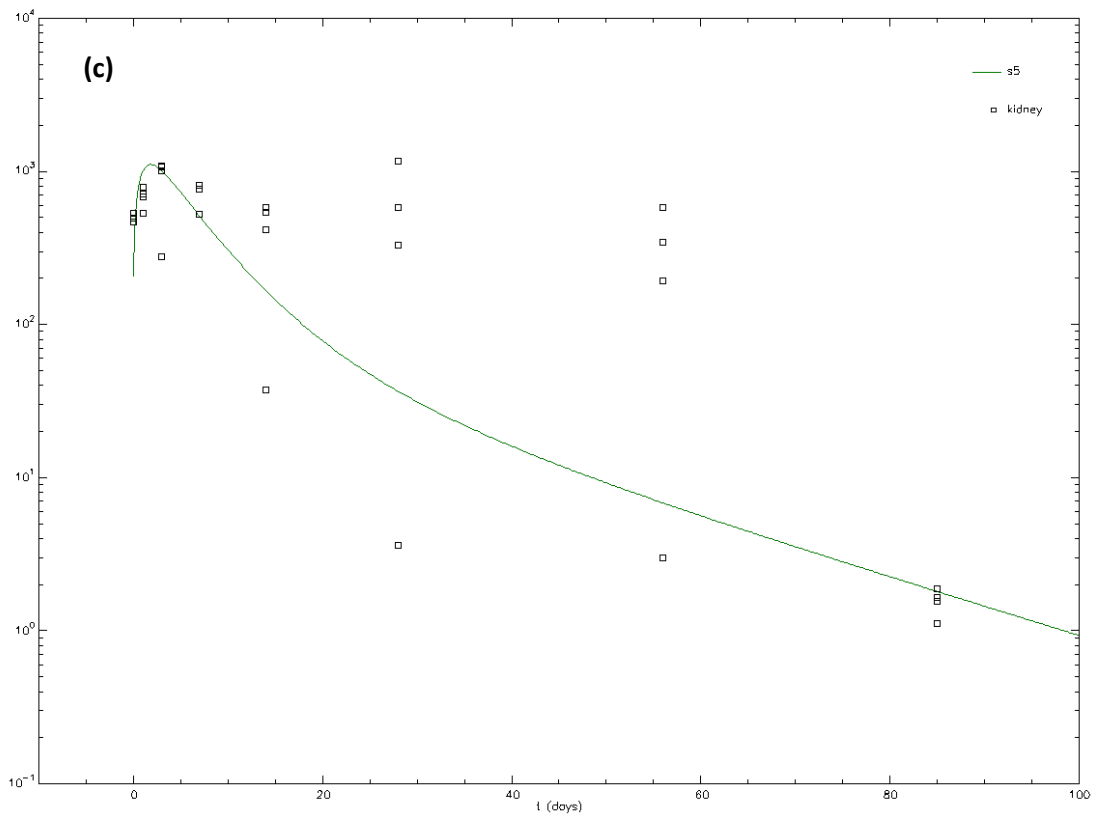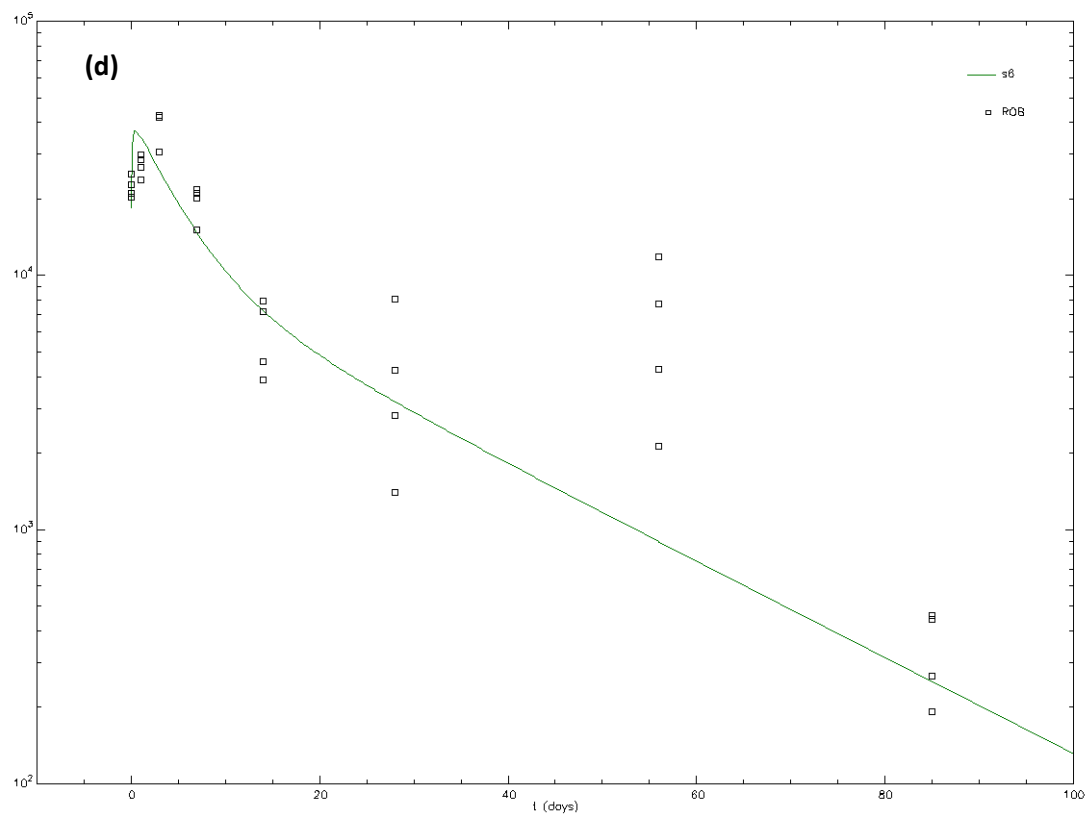

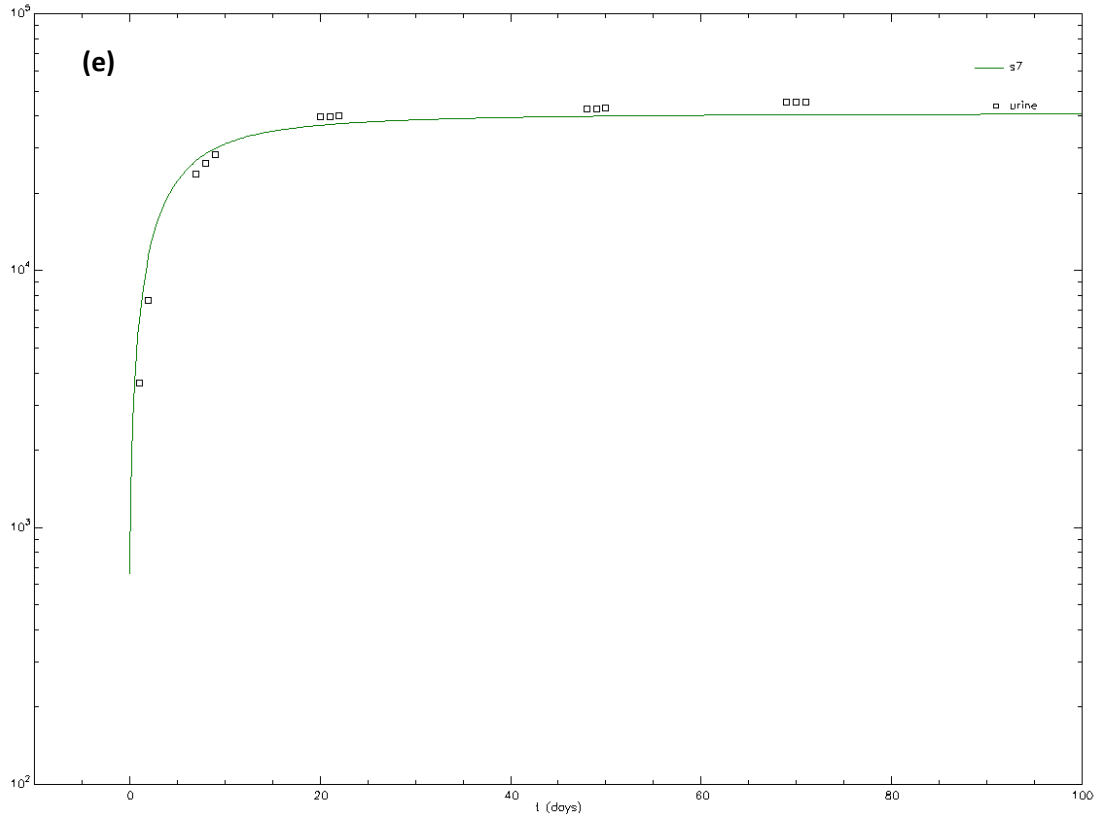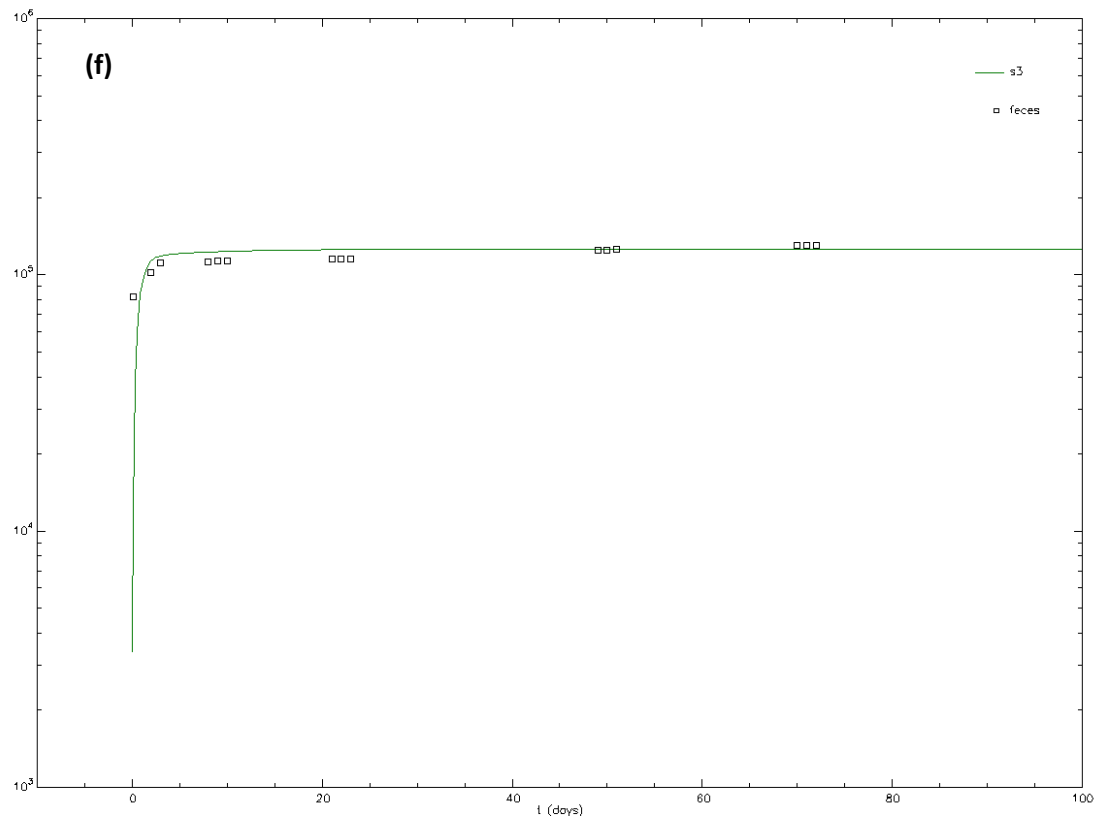

**Figure S5.** Fitting of rat biokinetic model to experimental data: (a) lung; (b) liver; (c) kidney; (d) rest of body (RoB); (e) urine; and (f) faeces. Tissue tritium content (Bq) in comparison to individual animals ( $n=4$ ) and for excreta mean ( $n=4$ ) cumulative excretion (Bq).

## References

1. Liu, Y.; Qi, Y.; Yin, C.; Wang, S.; Zhang, S.; Xu, A.; Chen, W.; Liu, S. Bio-transformation of Graphene Oxide in Lung Fluids Significantly Enhances Its Photothermal Efficacy. *Nanotheranostics* **2018**, *2*, 222-232, doi:10.7150/ntno.25719.
2. Piao, Y.; Liu, Y.; Xie, X. Change trends of organ weight background data in sprague dawley rats at different ages. *Journal of toxicologic pathology* **2013**, *26*, 29-34, doi:10.1293/tox.26.29.
3. Cool, D.A.; Maillie, H.D. Dissolution of tritiated glass microballoon fragments: implications for inhalation exposure. *Health Phys* **1983**, *45*, 791-794.
4. Cheng, Y.-S.; Dahl, A.R.; Jow, H.N. Dissolution of Metal Tritides in a Simulated Lung Fluid. *Health Physics* **1997**, *73*.
5. Inkret, W.C.T.; Schillaci, M.E.; Boyce, M.K.; Cheng, Y.S.; Efurd, D.W.; Little, T.T.; Miller, G.; Musgrave, J.A.; Wermer, J.R. Internal Dosimetry for Inhalation of Hafnium Tritide Aerosols. *Radiation Protection Dosimetry* **2001**, *93*, 55-60, doi:10.1093/oxfordjournals.rpd.a006413.
6. Cheng, Y.-S.; Zhou, Y.; Wang, Y.-S.; Inkret, W.C.; Wermer, J.R. Dose Estimate of Inhaled Hafnium Tritide using the ICRP 66 Lung Model. *Health Physics* **2002**, *82*.
7. Hodgson, A.; Rance, E.R.; Pellow, P.G.D.; Stradling, G.N. *In vitro dissolution of tritium loaded carbon particles from the JET Tokamak*; NRPB-DA/1/2002, NRPB: Chilton, Oxfordshire, UK, 2002.
8. Zhou, Y.; Cheng, Y.S. Dosimetry of Metal Tritide Particles as Evaluated by the ICRP 66 Model and a Biokinetic Model from Laboratory Rats. *Health Physics* **2004**, *86*.
9. Hodgson, S.A.; Scott, J.E.; Hodgson, A. *In vitro dissolution of tritium loaded particles from the JET fusion machine*; RPD-DAR-02-2006, HPA: Chilton, Oxfordshire, UK, 2006.
10. Zhou, Y.; Cheng, Y.-S.; Wang, Y. Dissolution Rate and Biokinetic Model of Zirconium Tritide Particles in Rat Lungs. *Health Physics* **2010**, *98*.
11. Cheng, Y.-S.; Snipes, M.B.; Wang, Y.; Jow, H.-N. Biokinetics and Dosimetry of Titanium Tritide Particles in the Lung. *Health Physics* **1999**, *76*.
12. Zhou, Y.; Cheng, Y.S. Dose Assessment for Inhaling Hafnium Particles Based on Laboratory Rats Study. *Health Physics* **2003**, *84*.
